# Supplementary material
Source: PubMed Central journal article supplement (PMC4248778)
Supplement: CVI.00547-14_zcd999095117so2.pdf [file CVI.00547-14_zcd999095117so2.pdf]

TABLE S1 GeneGo pathway analysis elucidates networks enriched in each cluster

(Clusters 1 and 2)

| Cluster                                                                | Enrichment by Pathway Maps                                                     | Total Genes    | Genes In Data  | p-value                                 | FDR                                                                                                                                                                                                                                | Network Objects from Active Data                                                                                                                                       |
|------------------------------------------------------------------------|--------------------------------------------------------------------------------|----------------|----------------|-----------------------------------------|------------------------------------------------------------------------------------------------------------------------------------------------------------------------------------------------------------------------------------|------------------------------------------------------------------------------------------------------------------------------------------------------------------------|
| Cluster 1: Stress Response / Inflammation (n=158)                      | ATP metabolism                                                                 | 106            | 5              | 4.40E-04                                | 1.05E-01                                                                                                                                                                                                                           | PDE8B, WARS, PKM2, PAPS2, ENP1                                                                                                                                         |
|                                                                        | G-protein signaling_Rac3 regulation pathway                                    | 16             | 2              | 4.14E-03                                | 3.68E-01                                                                                                                                                                                                                           | PAK1, DOCK7                                                                                                                                                            |
|                                                                        | Glycolysis and gluconeogenesis (short map)                                     | 66             | 3              | 7.46E-03                                | 3.68E-01                                                                                                                                                                                                                           | G3P2, PKM2, HXK3                                                                                                                                                       |
|                                                                        | Apoptosis and survival_NO signaling in apoptosis                               | 23             | 2              | 8.49E-03                                | 3.68E-01                                                                                                                                                                                                                           | G3P2, PAK1                                                                                                                                                             |
|                                                                        | Immune response_Inflammasome in inflammatory response                          | 34             | 2              | 1.80E-02                                | 3.68E-01                                                                                                                                                                                                                           | CARD5, Caspase-1                                                                                                                                                       |
|                                                                        | Development_Activation of ERK by Kappa-type opioid receptor                    | 36             | 2              | 2.01E-02                                | 3.68E-01                                                                                                                                                                                                                           | PLA2, Pyk2(FAK2)                                                                                                                                                       |
|                                                                        | G-protein signaling_G-Protein alpha-12 signaling pathway                       | 37             | 2              | 2.12E-02                                | 3.68E-01                                                                                                                                                                                                                           | PAK1, PDZ-RhoGEF                                                                                                                                                       |
|                                                                        | Immune response_Role of Integrins in NK cells cytotoxicity                     | 38             | 2              | 2.23E-02                                | 3.68E-01                                                                                                                                                                                                                           | PAK1, Pyk2(FAK2)                                                                                                                                                       |
|                                                                        | G-protein signaling_Regulation of p38 and JNK signaling mediated by G-proteins | 39             | 2              | 2.34E-02                                | 3.68E-01                                                                                                                                                                                                                           | PAK1, Pyk2(FAK2)                                                                                                                                                       |
|                                                                        | Tryptophan metabolism                                                          | 101            | 3              | 2.34E-02                                | 3.68E-01                                                                                                                                                                                                                           | WARS, INDO, AL1A1                                                                                                                                                      |
|                                                                        | <b>Total</b>                                                                   | <b>In Data</b> | <b>p-value</b> | <b>FDR</b>                              | <b>Network Objects from Active Data</b>                                                                                                                                                                                            |                                                                                                                                                                        |
|                                                                        | Cell adhesion_Platelet aggregation                                             | 158            | 6              | 1.83E-03                                | 1.92E-01                                                                                                                                                                                                                           | GAB3, Gab, PLA2, ENP1, Pyk2(FAK2), PLA2G7                                                                                                                              |
|                                                                        | Proliferation_Positive regulation cell proliferation                           | 221            | 6              | 9.43E-03                                | 3.87E-01                                                                                                                                                                                                                           | G-protein alpha-15, TCIRG1 (Atp6i), Beta-arrestin1, PAK1, Pyk2(FAK2), VEGF-B                                                                                           |
|                                                                        | Inflammation_Interferon signaling                                              | 110            | 4              | 1.27E-02                                | 3.87E-01                                                                                                                                                                                                                           | INDO, IL18RAP, Caspase-1, SOCS3                                                                                                                                        |
|                                                                        | Proteolysis_Connective tissue degradation                                      | 119            | 4              | 1.65E-02                                | 3.87E-01                                                                                                                                                                                                                           | Alpha 1-antitrypsin, Furin, ADAM15, Cystatin C                                                                                                                         |
| Apoptosis_Death Domain receptors & caspases in apoptosis               | 123                                                                            | 4              | 1.84E-02       | 3.87E-01                                | DR6(TNFRSF21), CARD5, Caspase-4, Caspase-1                                                                                                                                                                                         |                                                                                                                                                                        |
| Immune response_BCR pathway                                            | 137                                                                            | 4              | 2.62E-02       | 4.58E-01                                | BCAP, PAK1, Oct-2, Fc gamma RII beta                                                                                                                                                                                               |                                                                                                                                                                        |
| Immune response_Th17-derived cytokines                                 | 98                                                                             | 3              | 4.69E-02       | 7.04E-01                                | Calgranulin B, IL-17 receptor, SOCS3                                                                                                                                                                                               |                                                                                                                                                                        |
| Muscle contraction_Nitric oxide signaling in the cardiovascular system | 125                                                                            | 3              | 8.40E-02       | 8.36E-01                                | Beta-arrestin1, ERK1, Ca-ATPase2                                                                                                                                                                                                   |                                                                                                                                                                        |
| Proteolysis_Proteolysis in cell cycle and apoptosis                    | 125                                                                            | 3              | 8.40E-02       | 8.36E-01                                | Cathepsin H, Caspase-4, Caspase-1                                                                                                                                                                                                  |                                                                                                                                                                        |
| Immune response_Phagocytosis                                           | 222                                                                            | 4              | 1.10E-01       | 8.36E-01                                | MFGES, PAK1, Pyk2(FAK2), Fc gamma RII beta                                                                                                                                                                                         |                                                                                                                                                                        |
| <b>Total</b>                                                           | <b>In Data</b>                                                                 | <b>p-value</b> | <b>FDR</b>     | <b>Network Objects from Active Data</b> |                                                                                                                                                                                                                                    |                                                                                                                                                                        |
| cellular response to zinc ion                                          | 17                                                                             | 4              | 4.07E-06       | 2.16E-03                                | Metallothionein-I, Metallothionein-IG, Metallothionein-II, Metallothionein-IA                                                                                                                                                      |                                                                                                                                                                        |
| cellular response to cadmium ion                                       | 17                                                                             | 4              | 4.07E-06       | 2.16E-03                                | Metallothionein-I, Metallothionein-IG, Metallothionein-II, Metallothionein-IA                                                                                                                                                      |                                                                                                                                                                        |
| apoptotic process                                                      | 1325                                                                           | 19             | 1.11E-05       | 3.23E-03                                | GADD34, G3P2, DR6(TNFRSF21), CNB5, CARD5, Cathepsin H, PSMB8(LMP7), Phosphatase regulator (inhibitor), DAL1, Calgranulin B, PAK1, EBP50, PPM1F, Caspase-4, Caspase-1, Pyk2(FAK2), Cystatin C, GADD45 beta, PP2C                    |                                                                                                                                                                        |
| negative regulation of growth                                          | 279                                                                            | 4              | 1.22E-05       | 3.23E-03                                | Metallothionein-I, Metallothionein-IG, Metallothionein-II, Metallothionein-IA                                                                                                                                                      |                                                                                                                                                                        |
| plasma lipoprotein particle oxidation                                  | 2                                                                              | 2              | 4.34E-05       | 6.57E-03                                | PLA2, PLA2G7                                                                                                                                                                                                                       |                                                                                                                                                                        |
| response to muscle inactivity                                          | 9                                                                              | 2              | 4.34E-05       | 6.57E-03                                | Pyruvate kinase, PKM2                                                                                                                                                                                                              |                                                                                                                                                                        |
| lipid oxidation                                                        | 82                                                                             | 2              | 4.34E-05       | 6.57E-03                                | PLA2, PLA2G7                                                                                                                                                                                                                       |                                                                                                                                                                        |
| inflammatory response                                                  | 593                                                                            | 12             | 6.09E-05       | 8.07E-03                                | TLR5, CARD5, PLA2, INDO, Calgranulin B, Alpha 1-antitrypsin, IL18RAP, Caspase-4, JMDJ3, PLA2G7, AOA8, CD163                                                                                                                        |                                                                                                                                                                        |
| response to lithium ion                                                | 60                                                                             | 4              | 8.16E-05       | 9.61E-03                                | Pyruvate kinase, PLA2, Ionotropic glutamate receptor, Pyk2(FAK2)                                                                                                                                                                   |                                                                                                                                                                        |
| positive regulation of adaptive immune response                        | 128                                                                            | 3              | 9.76E-05       | 1.03E-02                                | CD74, CARD5, SASH3                                                                                                                                                                                                                 |                                                                                                                                                                        |
| Cluster 2: Type I Interferon Response (n=246)                          | <b>Total</b>                                                                   | <b>In Data</b> | <b>p-value</b> | <b>FDR</b>                              | <b>Network Objects from Active Data</b>                                                                                                                                                                                            |                                                                                                                                                                        |
|                                                                        | Immune response_IFN alpha/beta signaling pathway                               | 24             | 9              | 2.54E-13                                | 5.34E-11                                                                                                                                                                                                                           | ISG54, IFI6, STAT1, PML, STAT2, USP18, STAT1/STAT2, SOCS1, ISG15                                                                                                       |
|                                                                        | Immune response_Antiviral actions of Interferons                               | 52             | 9              | 5.87E-10                                | 6.16E-08                                                                                                                                                                                                                           | ADAR1, PKR, OAS2, OAS1, 2'-5'-oligoadenylate synthetase, INDO, STAT1, Mx, STAT2                                                                                        |
|                                                                        | Immune response_Role of PKR in stress-induced antiviral cell response          | 57             | 6              | 1.03E-05                                | 7.24E-04                                                                                                                                                                                                                           | IRF7, MyD88, IL-6, PKR, TLR2, STAT1                                                                                                                                    |
|                                                                        | Immune response_HMGB1/TLR signaling pathway                                    | 36             | 5              | 1.49E-05                                | 7.83E-04                                                                                                                                                                                                                           | IRF7, MyD88, IL-6, IL1RN, TLR2                                                                                                                                         |
|                                                                        | Immune response_Innate immune response to RNA viral infection                  | 28             | 4              | 1.01E-04                                | 4.25E-03                                                                                                                                                                                                                           | IRF7, MDA-5, RIG-I, TBK1                                                                                                                                               |
|                                                                        | Immune response_IL-1 signaling pathway                                         | 44             | 4              | 6.02E-04                                | 2.11E-02                                                                                                                                                                                                                           | MyD88, IL-6, Heme oxygenase 1, STAT1                                                                                                                                   |
|                                                                        | Bacterial infections in CF airways                                             | 48             | 4              | 8.40E-04                                | 2.39E-02                                                                                                                                                                                                                           | MyD88, TLR2, STAT1, TBK1                                                                                                                                               |
|                                                                        | Immune response_Bacterial infections in normal airways                         | 49             | 4              | 9.09E-04                                | 2.39E-02                                                                                                                                                                                                                           | MyD88, IL-6, TLR2, STAT1                                                                                                                                               |
|                                                                        | Development_Prolectin receptor signaling                                       | 58             | 4              | 1.71E-03                                | 3.98E-02                                                                                                                                                                                                                           | NMI, OAS1, STAT1, SOCS1                                                                                                                                                |
|                                                                        | Immune response_Antigen presentation by MHC class I                            | 28             | 3              | 1.90E-03                                | 3.98E-02                                                                                                                                                                                                                           | HSP90, Tapasin, PSMB8(LMP7)                                                                                                                                            |
|                                                                        | <b>Total</b>                                                                   | <b>In Data</b> | <b>p-value</b> | <b>FDR</b>                              | <b>Network Objects from Active Data</b>                                                                                                                                                                                            |                                                                                                                                                                        |
|                                                                        | Inflammation_Interferon signaling                                              | 110            | 24             | 1.21E-22                                | 1.39E-20                                                                                                                                                                                                                           | MICB, IFITM2, ISG54, IRF7, IFI56, PKR, IFI17, ISG20, Fc gamma RI, IFP 35, IFI27, IFI6, INDO, STAT1, Mx, PML, STAT2, CCL8, IFI44, GBP1, GBP2, STAT1/STAT2, SOCS1, ISG15 |
|                                                                        | Immune response_Innate immune response to RNA viral infection                  | 84             | 15             | 4.84E-13                                | 2.78E-11                                                                                                                                                                                                                           | IRF7, RPK3, MyD88, ADAR1, IL-6, PKR, MDA-5, RIG-I, 2'-5'-oligoadenylate synthetase, INDO, STAT1, Mx, STAT2, IP10, TBK1                                                 |
|                                                                        | Protein folding_ER and cytoplasm                                               | 45             | 7              | 2.87E-06                                | 1.10E-04                                                                                                                                                                                                                           | HSP90, Erp29, SCO2, ERO1Lalpha, ATF-6 alpha (50kDa), Glutaredoxin, ERO1                                                                                                |
| Inflammation_Inflammasome                                              | 118                                                                            | 10             | 6.15E-06       | 1.77E-04                                | IRF7, RPK3, MyD88, PKR, RPK2, MDA-5, RIG-I, INCA, TBK1, ISG15                                                                                                                                                                      |                                                                                                                                                                        |
| Inflammation_Innate inflammatory response                              | 181                                                                            | 12             | 9.04E-06       | 2.08E-04                                | PLA2, IRF7, RPK3, MyD88, Beta-defensin 1, IL-6, RPK2, TLR2, APOBEC3G, IP10, TBK1, cPLA2                                                                                                                                            |                                                                                                                                                                        |
| Protein folding_Response to unfolded proteins                          | 69                                                                             | 6              | 4.25E-04       | 8.14E-03                                | HSP90, Torsin B, ATF-6 alpha (50kDa), Glutaredoxin, HSP90 alpha, ERO1                                                                                                                                                              |                                                                                                                                                                        |
| Inflammation_IL-12,15,18 signaling                                     | 59                                                                             | 5              | 1.46E-03       | 2.41E-02                                | IL-15, MyD88, IL-18BP, STAT1, STAT1/STAT2                                                                                                                                                                                          |                                                                                                                                                                        |
| Proteolysis_Ubiquitin-proteasomal proteolysis                          | 166                                                                            | 8              | 2.48E-03       | 3.56E-02                                | UBCH8, HSP90, BAP1, EFP, VHL, Glutaredoxin, PSMB8(LMP7), Bard1                                                                                                                                                                     |                                                                                                                                                                        |
| Apoptosis_Apoptotic mitochondria                                       | 77                                                                             | 5              | 4.72E-03       | 6.04E-02                                | Bak, SNAPalpha, RPK2, Glutaredoxin, Glutaredoxin 1                                                                                                                                                                                 |                                                                                                                                                                        |
| Protein folding_Folding in normal condition                            | 119                                                                            | 6              | 6.93E-03       | 7.97E-02                                | HSP90, ERO1Lalpha, ATF-6 alpha (50kDa), VHL, HSP90 alpha, ERO1                                                                                                                                                                     |                                                                                                                                                                        |
| <b>Total</b>                                                           | <b>In Data</b>                                                                 | <b>p-value</b> | <b>FDR</b>     | <b>Network Objects from Active Data</b> |                                                                                                                                                                                                                                    |                                                                                                                                                                        |
| defense response to virus                                              | 197                                                                            | 38             | 1.95E-37       | 2.95E-34                                | OASL, UNC93B, FAM111A, IFITM2, ISG54, IRF7, IFI56, ADAR1, ZBP1, IL-6, PKR, IFI17, MDA-5, RIG-I, OAS2, APOBEC3F, EFP, ISG20, OAS1, 2'-5'-oligoadenylate synthetase, C6orf150, STAT1, Mx, RIG-G, PML, STAT2, APOBEC3G, Ceb1,         |                                                                                                                                                                        |
| type I interferon-mediated signaling pathway                           | 87                                                                             | 24             | 5.96E-28       | 4.51E-25                                | OASL, IFITM2, ISG54, IRF7, IFI56, ADAR1, IFI17, OAS2, ISG20, IFP 35, IFI27, OAS1, IFI6, PSMB8(LMP7), 2'-5'-oligoadenylate synthetase, STAT1, Mx, RIG-G, STAT2, USP18, GBP2, STAT1/STAT2, SOCS1, ISG15                              |                                                                                                                                                                        |
| response to virus                                                      | 322                                                                            | 25             | 1.88E-21       | 9.48E-19                                | OASL, Galpha(i)-specific amine GPCRs, IFITM2, ISG54, IRF7, IFI56, MyD88, ADAR1, PKR, IFI17, MDA-5, RIG-I, OAS2, ISG20, IFP 35, OAS1, 2'-5'-oligoadenylate synthetase, Mx, RIG-G, IP10, Staf-50, CCL8, IFI44, TBK1, DDX60           |                                                                                                                                                                        |
| cytokine-mediated signaling pathway                                    | 439                                                                            | 32             | 2.73E-21       | 1.03E-18                                | UBCH8, OASL, IFITM2, ISG54, IRF7, IGFBP, IFI56, MyD88, ADAR1, IL-6, IFI17, OAS2, ISG20, Fc gamma RI, IFP 35, IFI27, OAS1, IFI6, PSMB8(LMP7), 2'-5'-oligoadenylate synthetase, STAT1, Mx, RIG-G, PML, STAT2, Ceb1, USP18, GBP1      |                                                                                                                                                                        |
| negative regulation of viral genome replication                        | 46                                                                             | 14             | 2.93E-18       | 8.87E-16                                | OASL, FAM111A, IFITM2, IFI56, PKR, IFI17, APOBEC3F, ISG20, OAS1, 2'-5'-oligoadenylate synthetase, Mx, APOBEC3G, PL scramblase 1, ISG15                                                                                             |                                                                                                                                                                        |
| innate immune response                                                 | 985                                                                            | 40             | 1.67E-16       | 4.21E-14                                | UBCH8, HSP90, OASL, UNC93B, PLA2, IFITM2, ISG54, IRF7, RPK3, IFI56, MyD88, Beta-defensin 1, ADAR1, ZBP1, PKR, IFI17, RPK2, MDA-5, RIG-I, OAS2, APOBEC3F, EFP, ISG20, MOV-10, Fc gamma RI, OAS1, TLR2, HSP90 alpha, 2'-5'-          |                                                                                                                                                                        |
| immune response                                                        | 1505                                                                           | 28             | 2.10E-12       | 4.53E-10                                | MICB, OASL, IL-15, IFITM2, Tapasin, IGFBP, MyD88, Beta-defensin 1, IL-6, OAS2, IL1RN, Fc gamma RI, Galpha(i)-specific Class A Orphan/other GPCRs, Fc gamma RII beta, IFP 35, OAS1, IFI6, TLR2, 2'-5'-oligoadenylate synthetase, Mx |                                                                                                                                                                        |
| interferon-gamma-mediated signaling pathway                            | 94                                                                             | 13             | 1.58E-11       | 2.98E-09                                | OASL, IRF7, IGFBP, OAS2, Fc gamma RI, OAS1, 2'-5'-oligoadenylate synthetase, STAT1, PML, GBP1, GBP2, STAT1/STAT2, SOCS1                                                                                                            |                                                                                                                                                                        |
| modulation by virus of host morphology or physiology                   | 524                                                                            | 26             | 2.36E-11       | 3.97E-09                                | MICB, FAM111A, IRF7, RPK3, IFI56, DYNLT, ZBP1, PKR, MDA-5, RIG-I, EFP, Dynein, axonemal, light chains, Fc gamma RII beta, PSMB8(LMP7), Tctex-1, STAT1, PML, STAT2, APOBEC3G, Staf-50, TBK1, STAT1/STAT2, GCN5, LTRB(TNFR           |                                                                                                                                                                        |
| defense response to Gram-positive bacterium                            | 66                                                                             | 9              | 2.58E-08       | 3.90E-06                                | PLA2, MyD88, IL-6, RPK2, GBP6, TLR2, GBP1, TBK1, GBP2                                                                                                                                                                              |                                                                                                                                                                        |

# Table S1 (Continued)

## (Clusters 3 and 4)

| Cluster                                                                                         | Enrichment by                                                         | Pathway Maps                                                                           | Total                                                                                             | In Data  | p-value  | FDR                                                                                                                                              | Network Objects from Active Data                                                                                                                                |                                                                                                                                                                               |
|-------------------------------------------------------------------------------------------------|-----------------------------------------------------------------------|----------------------------------------------------------------------------------------|---------------------------------------------------------------------------------------------------|----------|----------|--------------------------------------------------------------------------------------------------------------------------------------------------|-----------------------------------------------------------------------------------------------------------------------------------------------------------------|-------------------------------------------------------------------------------------------------------------------------------------------------------------------------------|
| Cluster 3: Antigen presentation / Myeloid Precursor (n=146)                                     | Enrichment by Pathway Maps                                            | Signal transduction_Calcium signaling                                                  | 45                                                                                                | 3        | 1.18E-03 | 1.51E-01                                                                                                                                         | Ca-ATPase2, Phospholamban, MEF2                                                                                                                                 |                                                                                                                                                                               |
|                                                                                                 |                                                                       | PGE2 pathways in cancer                                                                | 55                                                                                                | 3        | 2.11E-03 | 1.51E-01                                                                                                                                         | Tcf(Lef), Lef-1, PGE2R4                                                                                                                                         |                                                                                                                                                                               |
|                                                                                                 |                                                                       | wtCFTR and deltaF508-CFTR traffic / Clathrin coated vesicles formation (normal and CF) | 20                                                                                                | 2        | 3.86E-03 | 1.84E-01                                                                                                                                         | PICALM, Eps15                                                                                                                                                   |                                                                                                                                                                               |
|                                                                                                 |                                                                       | Immune response_Antigen presentation by MHC class I                                    | 28                                                                                                | 2        | 7.50E-03 | 2.31E-01                                                                                                                                         | Tapasin, MHC class I                                                                                                                                            |                                                                                                                                                                               |
|                                                                                                 |                                                                       | Immune response_IL-6 signaling pathway                                                 | 31                                                                                                | 2        | 9.14E-03 | 2.31E-01                                                                                                                                         | IL6RA, sIL6-RA                                                                                                                                                  |                                                                                                                                                                               |
|                                                                                                 |                                                                       | Glycogen metabolism                                                                    | 38                                                                                                | 2        | 1.35E-02 | 2.31E-01                                                                                                                                         | UGPA1, UGPA2                                                                                                                                                    |                                                                                                                                                                               |
|                                                                                                 |                                                                       | Regulation of lipid metabolism_PPAR regulation of lipid metabolism                     | 42                                                                                                | 2        | 1.64E-02 | 2.31E-01                                                                                                                                         | Fatty acid-binding protein, ACADM                                                                                                                               |                                                                                                                                                                               |
|                                                                                                 |                                                                       | Vitamin B7 (biotin) metabolism                                                         | 47                                                                                                | 2        | 2.03E-02 | 2.31E-01                                                                                                                                         | Histone H2, BPL1                                                                                                                                                |                                                                                                                                                                               |
|                                                                                                 |                                                                       | Immune response_Function of ME2 in T lymphocytes                                       | 51                                                                                                | 2        | 2.36E-02 | 2.31E-01                                                                                                                                         | MEF2A, MEF2                                                                                                                                                     |                                                                                                                                                                               |
|                                                                                                 |                                                                       | Development_Beta-adrenergic receptors signaling via cAMP                               | 52                                                                                                | 2        | 2.45E-02 | 2.31E-01                                                                                                                                         | Ca-ATPase2, Phospholamban                                                                                                                                       |                                                                                                                                                                               |
|                                                                                                 |                                                                       | Enrichment by Process Networks                                                         | Immune response_Antigen presentation                                                              | 197      | 5        | 6.89E-03                                                                                                                                         | 4.42E-01                                                                                                                                                        | HLA-C, Tapasin, MHC class I, TRAF6, HLA-Cw3                                                                                                                                   |
|                                                                                                 |                                                                       |                                                                                        | Cardiac development_Wnt_beta-catenin, Notch, VEGF, IP3 and Integrin signaling                     | 150      | 4        | 1.32E-02                                                                                                                                         | 4.42E-01                                                                                                                                                        | MEF2A, Tcf(Lef), Phospholamban, MEF2                                                                                                                                          |
|                                                                                                 | Development_Ossification and bone remodeling                          |                                                                                        | 157                                                                                               | 4        | 1.54E-02 | 4.42E-01                                                                                                                                         | Lef-1, Galpha(s)-specific prostanoid GPCRs, TRAF6, PGE2R4                                                                                                       |                                                                                                                                                                               |
|                                                                                                 | Transcription_Chromatin modification                                  |                                                                                        | 128                                                                                               | 3        | 4.37E-02 | 7.60E-01                                                                                                                                         | Histone H2, Histone H2B, SDS3                                                                                                                                   |                                                                                                                                                                               |
|                                                                                                 | Immune response_Phagosome in antigen presentation                     |                                                                                        | 243                                                                                               | 4        | 6.15E-02 | 7.60E-01                                                                                                                                         | HLA-C, Tapasin, MHC class I, HLA-Cw3                                                                                                                            |                                                                                                                                                                               |
|                                                                                                 | Protein folding_Response to unfolded proteins                         |                                                                                        | 69                                                                                                | 2        | 6.72E-02 | 7.60E-01                                                                                                                                         | XPB1, HSP10 (mitochondrial)                                                                                                                                     |                                                                                                                                                                               |
|                                                                                                 | Apoptosis_Apoptotic nucleus                                           |                                                                                        | 159                                                                                               | 3        | 7.40E-02 | 7.60E-01                                                                                                                                         | Apaf-1, BAG5, Histone H2B                                                                                                                                       |                                                                                                                                                                               |
|                                                                                                 | Inflammation_Complement system                                        |                                                                                        | 73                                                                                                | 2        | 7.41E-02 | 7.60E-01                                                                                                                                         | C1qc, CR1                                                                                                                                                       |                                                                                                                                                                               |
|                                                                                                 | Inflammation_NK cell cytotoxicity                                     |                                                                                        | 164                                                                                               | 3        | 7.95E-02 | 7.60E-01                                                                                                                                         | HLA-C, MHC class I, Histone H2B                                                                                                                                 |                                                                                                                                                                               |
|                                                                                                 | Apoptosis_Endoplasmic reticulum stress pathway                        |                                                                                        | 87                                                                                                | 2        | 1.00E-01 | 7.76E-01                                                                                                                                         | Apaf-1, XPB1                                                                                                                                                    |                                                                                                                                                                               |
|                                                                                                 | Enrichment by GO Processes                                            |                                                                                        | antigen processing and presentation of peptide antigen via MHC class I                            | 157      | 9        | 1.36E-07                                                                                                                                         | 5.74E-05                                                                                                                                                        | HLA-C, HLA-Cw4, ITGB5, Sec24, Tapasin, MHC class I, Sec24A, HLA-Cw7, HLA-Cw3                                                                                                  |
|                                                                                                 |                                                                       |                                                                                        | antigen processing and presentation of exogenous peptide antigen via MHC class I, TAP-independent | 24       | 5        | 1.68E-07                                                                                                                                         | 5.74E-05                                                                                                                                                        | HLA-C, HLA-Cw4, MHC class I, HLA-Cw7, HLA-Cw3                                                                                                                                 |
|                                                                                                 |                                                                       | immune response                                                                        | 1505                                                                                              | 15       | 2.13E-07 | 5.74E-05                                                                                                                                         | HLA-C, HLA-Cw4, C1qb, Tapasin, PRG2, C1qc, Tcf(Lef), MHC class I, Galpha(s)-specific prostanoid GPCRs, XPB1, TRAF6, HLA-Cw7, PGE2R4, Fc alpha receptor, HLA-Cw3 |                                                                                                                                                                               |
|                                                                                                 |                                                                       | positive regulation of cell proliferation in bone marrow                               | 6                                                                                                 | 3        | 1.54E-06 | 3.12E-04                                                                                                                                         | Tcf(Lef), Lef-1, MEF2                                                                                                                                           |                                                                                                                                                                               |
| antigen processing and presentation of exogenous peptide antigen via MHC class I, TAP-dependent |                                                                       | 111                                                                                    | 7                                                                                                 | 2.45E-06 | 3.95E-04 | HLA-C, HLA-Cw4, ITGB5, Tapasin, MHC class I, HLA-Cw7, HLA-Cw3                                                                                    |                                                                                                                                                                 |                                                                                                                                                                               |
| antigen processing and presentation of exogenous peptide antigen via MHC class I                |                                                                       | 118                                                                                    | 7                                                                                                 | 3.68E-06 | 4.95E-04 | HLA-C, HLA-Cw4, ITGB5, Tapasin, MHC class I, HLA-Cw7, HLA-Cw3                                                                                    |                                                                                                                                                                 |                                                                                                                                                                               |
| type 1 interferon-mediated signaling pathway                                                    |                                                                       | 87                                                                                     | 6                                                                                                 | 7.88E-06 | 9.09E-04 | HLA-C, HLA-Cw4, MHC class I, SP100, HLA-Cw7, HLA-Cw3                                                                                             |                                                                                                                                                                 |                                                                                                                                                                               |
| positive regulation of T cell mediated cytotoxicity                                             |                                                                       | 56                                                                                     | 5                                                                                                 | 1.10E-05 | 1.11E-03 | HLA-C, HLA-Cw4, MHC class I, HLA-Cw7, HLA-Cw3                                                                                                    |                                                                                                                                                                 |                                                                                                                                                                               |
| interferon-gamma-mediated signaling pathway                                                     |                                                                       | 94                                                                                     | 6                                                                                                 | 1.23E-05 | 1.11E-03 | HLA-C, HLA-Cw4, MHC class I, SP100, HLA-Cw7, HLA-Cw3                                                                                             |                                                                                                                                                                 |                                                                                                                                                                               |
| negative regulation of apoptotic process in bone marrow                                         |                                                                       | 3                                                                                      | 2                                                                                                 | 2.92E-05 | 1.72E-03 | Tcf(Lef), Lef-1                                                                                                                                  |                                                                                                                                                                 |                                                                                                                                                                               |
| Cluster 4: Innate Immune Response, IL-17/IL-1 Signaling (n=130)                                 |                                                                       | Enrichment by Pathway Maps                                                             | Immune response_TLR2 and TLR4 signaling pathways                                                  | 57       | 8        | 1.25E-10                                                                                                                                         | 2.80E-08                                                                                                                                                        | I-kB, COX-2 (PTGS2), TLR4, TAB2, TPL2(MAP3K8), IL-1 beta, IL-8, Pellino 1                                                                                                     |
|                                                                                                 |                                                                       |                                                                                        | Immune response_MIF in innate immunity response                                                   | 40       | 7        | 3.95E-10                                                                                                                                         | 4.42E-08                                                                                                                                                        | I-kB, COX-2 (PTGS2), TLR4, TAB2, C/EBPbeta, IL-1 beta, IL-8                                                                                                                   |
|                                                                                                 | Immune response_HSP60 and HSP70/TLR signaling pathway                 |                                                                                        | 54                                                                                                | 7        | 3.58E-09 | 2.67E-07                                                                                                                                         | I-kB, CD83, TLR4, TAB2, TPL2(MAP3K8), IL-1 beta, IL-8                                                                                                           |                                                                                                                                                                               |
|                                                                                                 | Immune response_Role of PKR in stress-induced antiviral cell response |                                                                                        | 57                                                                                                | 7        | 5.29E-09 | 2.96E-07                                                                                                                                         | I-kB, IRF1, TLR4, TAB2, IL-1 beta, IL-8, NFKBIA                                                                                                                 |                                                                                                                                                                               |
|                                                                                                 | Immune response_IL-1 signaling pathway                                |                                                                                        | 44                                                                                                | 6        | 3.79E-08 | 1.70E-06                                                                                                                                         | I-kB, IRF1, COX-2 (PTGS2), TAB2, IL-1 beta, IL-8                                                                                                                |                                                                                                                                                                               |
|                                                                                                 | Immune response_TLR5, TLR7, TLR8 and TLR9 signaling pathways          |                                                                                        | 48                                                                                                | 6        | 6.51E-08 | 2.36E-06                                                                                                                                         | I-kB, IRF1, TAB2, TPL2(MAP3K8), IL-1 beta, IL-8                                                                                                                 |                                                                                                                                                                               |
|                                                                                                 | Immune response_Bacterial infections in normal airways                |                                                                                        | 49                                                                                                | 6        | 7.39E-08 | 2.36E-06                                                                                                                                         | I-kB, IRF1, TLR4, TAB2, IL-1 beta, IL-8                                                                                                                         |                                                                                                                                                                               |
|                                                                                                 | Apoptosis and survival_Role of PKR in stress-induced apoptosis        |                                                                                        | 53                                                                                                | 6        | 1.20E-07 | 3.35E-06                                                                                                                                         | p21, I-kB, IRF1, TLR4, TAB2, NFKBIA                                                                                                                             |                                                                                                                                                                               |
|                                                                                                 | Immune response_TREM1 signaling pathway                               |                                                                                        | 59                                                                                                | 6        | 2.30E-07 | 5.71E-06                                                                                                                                         | I-kB, TLR4, TREM1, IL-1 beta, IL-8, NFKBIA                                                                                                                      |                                                                                                                                                                               |
|                                                                                                 | Immune response_IL-17 signaling pathways                              |                                                                                        | 60                                                                                                | 6        | 2.55E-07 | 5.71E-06                                                                                                                                         | I-kB, COX-2 (PTGS2), C/EBPbeta, IL-1 beta, IL-8, CCL7                                                                                                           |                                                                                                                                                                               |
|                                                                                                 | Enrichment by Process Networks                                        |                                                                                        | Immune response_Th17-derived cytokines                                                            | 98       | 9        | 1.33E-07                                                                                                                                         | 1.45E-05                                                                                                                                                        | I-kB, COX-2 (PTGS2), TIMP1, C/EBPbeta, IL-1 beta, C/EBP, IL-8, Mcl-1, CCL7                                                                                                    |
|                                                                                                 |                                                                       |                                                                                        | Inflammation_TREM1 signaling                                                                      | 145      | 9        | 3.72E-06                                                                                                                                         | 2.03E-04                                                                                                                                                        | I-kB, CD83, TIMP1, TLR4, TREM1, IL-1 beta, IL-8, NFKBIA, CCL7                                                                                                                 |
|                                                                                                 |                                                                       | Inflammation_IL-10 anti-inflammatory response                                          | 87                                                                                                | 7        | 8.93E-06 | 3.25E-04                                                                                                                                         | I-kB, TIMP1, TLR4, TREM1, IL-1 beta, IL-8, NFKBIA                                                                                                               |                                                                                                                                                                               |
|                                                                                                 |                                                                       | Inflammation_MIF signaling                                                             | 140                                                                                               | 8        | 2.48E-05 | 6.75E-04                                                                                                                                         | I-kB, COX-2 (PTGS2), TLR4, IL-1 beta, ETS, IL-8, NFKBIA, ETS2                                                                                                   |                                                                                                                                                                               |
|                                                                                                 |                                                                       | Inflammation_IFN-gamma signaling                                                       | 110                                                                                               | 6        | 3.56E-04 | 7.75E-03                                                                                                                                         | p21, I-kB, IRF1, TLR4, C/EBPbeta, NFKBIA                                                                                                                        |                                                                                                                                                                               |
|                                                                                                 |                                                                       | Development_Regulation of angiogenesis                                                 | 223                                                                                               | 8        | 6.31E-04 | 1.09E-02                                                                                                                                         | p21, I-kB, PLAU (uPAR), HB-EGF, TAB2, IL-1 beta, IL-8, HIF1A                                                                                                    |                                                                                                                                                                               |
|                                                                                                 |                                                                       | Cell adhesion_Platelet-endothelium-leucocyte interactions                              | 174                                                                                               | 7        | 7.19E-04 | 1.09E-02                                                                                                                                         | I-kB, PLAU (uPAR), IL-1 beta, OBP22/MSR1(CD204), IL-8, PAI2, NFKBIA                                                                                             |                                                                                                                                                                               |
|                                                                                                 |                                                                       | Cell cycle_G1-S Interleukin regulation                                                 | 128                                                                                               | 6        | 7.98E-04 | 1.09E-02                                                                                                                                         | p21, I-kB, JunB, IL-1 beta, IL-8, NFKBIA                                                                                                                        |                                                                                                                                                                               |
|                                                                                                 |                                                                       | Inflammation_Innate inflammatory response                                              | 181                                                                                               | 7        | 9.08E-04 | 1.09E-02                                                                                                                                         | I-kB, COX-2 (PTGS2), TLR4, TAB2, IL-1 beta, IL-8, NFKBIA                                                                                                        |                                                                                                                                                                               |
|                                                                                                 |                                                                       | Proliferation_Negative regulation of cell proliferation                                | 184                                                                                               | 7        | 1.00E-03 | 1.09E-02                                                                                                                                         | p21, CCL3L1, COX-2 (PTGS2), BTG3, IL-1 beta, IL-8, Oncostatin M                                                                                                 |                                                                                                                                                                               |
|                                                                                                 |                                                                       | Enrichment by GO Processes                                                             | positive regulation of transcription from RNA polymerase II promoter                              | 1023     | 22       | 2.46E-08                                                                                                                                         | 2.26E-05                                                                                                                                                        | NURR1, MaFb, I-kB, PIAS2, CCL3L1, IRF1, AXUD1, JunB, FOXP1, TLR4, DDX3X, C/EBPbeta, IL-1 beta, ETS, C/EBP, Oncostatin M, PSM09, FOXP1/2/4 proteins, NFKBIA, NOR1, ETS2, HIF1A |
|                                                                                                 |                                                                       |                                                                                        | immune response                                                                                   | 1505     | 16       | 4.31E-08                                                                                                                                         | 2.26E-05                                                                                                                                                        | CCL3L1, E4BP4, CCL4L1, GPR65, TLR4, C/EBPbeta, IL-1 beta, ETS, CD1b, C/EBP, IL-8, Oncostatin M, EB12, chemokine (C-C motif) ligand 4-like 1, CCL14, CCL7                      |
|                                                                                                 | negative regulation of apoptotic process                              |                                                                                        | 1022                                                                                              | 18       | 6.08E-07 | 2.12E-04                                                                                                                                         | p21, I-kB, PLAU (uPAR), TIMP1, DDX3X, Pim-3, C/EBPbeta, IL-1 beta, IEX1, C/EBP, PAI2, SON, PSM09, Mcl-1, NFKBIA, NOR1, Albumin, HIF1A                           |                                                                                                                                                                               |
|                                                                                                 | lipopolysaccharide-mediated signaling pathway                         |                                                                                        | 41                                                                                                | 5        | 3.01E-06 | 7.88E-04                                                                                                                                         | I-kB, CCL3L1, TLR4, IL-1 beta, NFKBIA                                                                                                                           |                                                                                                                                                                               |
| positive regulation of transcription, DNA-dependent                                             | 1383                                                                  |                                                                                        | 16                                                                                                | 3.78E-06 | 7.92E-04 | NURR1, I-kB, PIAS2, IRF1, FOXP1, C/EBPbeta, IL-1 beta, ETS, C/EBP, ID2, PSM09, Trp53inp2, FOXP1/2/4 proteins, NFKBIA, ETS2, HIF1A                |                                                                                                                                                                 |                                                                                                                                                                               |
| apoptotic process                                                                               | 1325                                                                  |                                                                                        | 17                                                                                                | 1.28E-05 | 1.81E-03 | I-kB, AXUD1, GPR65, KLF11 (TIEG2), DDX3X, Pim-3, IL-1 beta, IEX1, GPR109A, G0/G1switch 2, Oncostatin M, PSM09, Mcl-1, TIEG, MCP1P, NFKBIA, FEM1B |                                                                                                                                                                 |                                                                                                                                                                               |
| negative regulation of cell proliferation                                                       | 802                                                                   |                                                                                        | 13                                                                                                | 1.60E-05 | 1.81E-03 | p21, CCL3L1, IRF1, COX-2 (PTGS2), KLF11 (TIEG2), BTG3, IL-1 beta, ETS, C/EBP, IL-8, Oncostatin M, TIEG, Ctmn                                     |                                                                                                                                                                 |                                                                                                                                                                               |
| toll-like receptor signaling pathway                                                            | 159                                                                   |                                                                                        | 7                                                                                                 | 1.61E-05 | 1.81E-03 | I-kB, Cathespins L, MKP-3, TLR4, TAB2, Pellino 1, NFKBIA                                                                                         |                                                                                                                                                                 |                                                                                                                                                                               |
| toll-like receptor TLR6:TLR2 signaling pathway                                                  | 98                                                                    |                                                                                        | 6                                                                                                 | 1.73E-05 | 1.81E-03 | I-kB, MKP-3, TLR4, TAB2, Pellino 1, NFKBIA                                                                                                       |                                                                                                                                                                 |                                                                                                                                                                               |
| toll-like receptor TLR1:TLR2 signaling pathway                                                  | 98                                                                    |                                                                                        | 6                                                                                                 | 1.73E-05 | 1.81E-03 | I-kB, MKP-3, TLR4, TAB2, Pellino 1, NFKBIA                                                                                                       |                                                                                                                                                                 |                                                                                                                                                                               |

Table S1 (Continued)

(Clusters 5 and 6)

|                                                                                                                   | Total | In Data | p-value  | FDR      | Network Objects from Active Data                                                                                                                                                                                                     |
|-------------------------------------------------------------------------------------------------------------------|-------|---------|----------|----------|--------------------------------------------------------------------------------------------------------------------------------------------------------------------------------------------------------------------------------------|
| <b>Cluster 5: Hematopoiesis (n=75)</b>                                                                            |       |         |          |          |                                                                                                                                                                                                                                      |
| <b>Enrichment by Pathway Maps</b>                                                                                 |       |         |          |          |                                                                                                                                                                                                                                      |
| Transcription_Transcription regulation of aminoacid metabolism                                                    | 25    | 2       | 1.67E-03 | 1.56E-01 | ALAS2, FECH                                                                                                                                                                                                                          |
| Apoptosis and survival_BAD phosphorylation                                                                        | 42    | 2       | 4.68E-03 | 1.66E-01 | Bcl-XL, PP2C                                                                                                                                                                                                                         |
| Mitochondrial unsaturated fatty acid beta-oxidation                                                               | 45    | 2       | 5.36E-03 | 1.66E-01 | ACSL6, HADHB                                                                                                                                                                                                                         |
| Mitochondrial long chain fatty acid beta-oxidation                                                                | 83    | 2       | 1.74E-02 | 1.89E-01 | ACSL6, HADHB                                                                                                                                                                                                                         |
| Heme metabolism                                                                                                   | 105   | 2       | 2.71E-02 | 1.89E-01 | ALAS2, FECH                                                                                                                                                                                                                          |
| Mechanism of Ploglitazone/ Metformin and Rosiglitazone/ Metformin cooperative action in Diabetes mellitus, Type 2 | 16    | 1       | 3.87E-02 | 1.89E-01 | AdipoR1                                                                                                                                                                                                                              |
| Cell cycle_Cell cycle (generic schema)                                                                            | 21    | 1       | 5.05E-02 | 1.89E-01 | E2F2                                                                                                                                                                                                                                 |
| Transcription_CHREBP regulation pathway                                                                           | 21    | 1       | 5.05E-02 | 1.89E-01 | Acyl-CoA synthetase                                                                                                                                                                                                                  |
| Development_Thrombopoietin signaling via JAK-STAT pathway                                                         | 22    | 1       | 5.28E-02 | 1.89E-01 | Bcl-XL                                                                                                                                                                                                                               |
| Immune response_IL-15 signaling via JAK-STAT cascade                                                              | 23    | 1       | 5.52E-02 | 1.89E-01 | Bcl-XL                                                                                                                                                                                                                               |
| <b>Enrichment by Process Networks</b>                                                                             |       |         |          |          |                                                                                                                                                                                                                                      |
| Cell cycle_G0-G1                                                                                                  | 71    | 3       | 9.52E-04 | 4.95E-02 | E2F2, PP2C alpha, p18                                                                                                                                                                                                                |
| Transport_Iron transport                                                                                          | 108   | 2       | 3.61E-02 | 4.71E-01 | PP2C alpha, FECH                                                                                                                                                                                                                     |
| Cell cycle_Core                                                                                                   | 115   | 2       | 4.05E-02 | 4.71E-01 | E2F2, p18                                                                                                                                                                                                                            |
| DNA damage_Checkpoint                                                                                             | 124   | 2       | 4.64E-02 | 4.71E-01 | SNM1, GADD45 alpha                                                                                                                                                                                                                   |
| Development_Hemopoiesis, Erythropoietin pathway                                                                   | 136   | 2       | 5.47E-02 | 4.71E-01 | Bcl-XL, HBG1                                                                                                                                                                                                                         |
| Response to hypoxia and oxidative stress                                                                          | 163   | 2       | 7.53E-02 | 4.71E-01 | p18, GPX4 (PHGpx)                                                                                                                                                                                                                    |
| Cytoskeleton_Actin filaments                                                                                      | 176   | 2       | 8.59E-02 | 4.71E-01 | Tropomodulin, EPB41                                                                                                                                                                                                                  |
| Cytoskeleton_Regulation of cytoskeleton rearrangement                                                             | 183   | 2       | 9.18E-02 | 4.71E-01 | Tropomodulin, EPB41                                                                                                                                                                                                                  |
| Cell adhesion_Amyloid proteins                                                                                    | 195   | 2       | 1.02E-01 | 4.71E-01 | BACE2, Bcl-XL                                                                                                                                                                                                                        |
| Autophagy_Autophagy                                                                                               | 55    | 1       | 1.43E-01 | 4.71E-01 | Bcl-XL                                                                                                                                                                                                                               |
| <b>Enrichment by GO Processes</b>                                                                                 |       |         |          |          |                                                                                                                                                                                                                                      |
| oxygen transport                                                                                                  | 20    | 4       | 5.08E-07 | 2.65E-04 | HBG, HGBA, HBG1, Adult hemoglobin                                                                                                                                                                                                    |
| fatty acid metabolic process                                                                                      | 35    | 7       | 3.42E-06 | 8.93E-04 | ACSL6, ACSM3, HADHB, Acyl-coenzyme A synthetase ACSM3, mitochondrial precursor, AdipoR1, Alpha-nuclein, Acyl-CoA synthetase                                                                                                          |
| response to lead ion                                                                                              | 35    | 4       | 5.29E-06 | 9.20E-04 | ALAS2, Bcl-XS, Bcl-XL, FECH                                                                                                                                                                                                          |
| apoptotic process in bone marrow                                                                                  | 2     | 2       | 1.08E-05 | 1.41E-03 | Bcl-XS, Bcl-XL                                                                                                                                                                                                                       |
| positive regulation of plasma membrane long-chain fatty acid transport                                            | 3     | 2       | 3.22E-05 | 2.74E-03 | ACSL6, Acyl-CoA synthetase                                                                                                                                                                                                           |
| suppression by virus of host apoptotic process                                                                    | 3     | 2       | 3.22E-05 | 2.74E-03 | Bcl-XS, Bcl-XL                                                                                                                                                                                                                       |
| cell cycle arrest                                                                                                 | 194   | 6       | 3.67E-05 | 2.74E-03 | ILP1P, PP2C alpha, p18, PP2C, Sestrin 3, GADD45 alpha                                                                                                                                                                                |
| heme biosynthetic process                                                                                         | 24    | 3       | 5.09E-05 | 2.80E-03 | SLC25A39, ALAS2, FECH                                                                                                                                                                                                                |
| protein heterooligomerization                                                                                     | 160   | 5       | 5.22E-05 | 2.80E-03 | HBG, HGBA, PINCH, HBG1, Adult hemoglobin                                                                                                                                                                                             |
| response to cycloheximide                                                                                         | 7     | 2       | 6.43E-05 | 2.80E-03 | Bcl-XS, Bcl-XL                                                                                                                                                                                                                       |
| <b>Cluster 6: Undefined (n=324)</b>                                                                               |       |         |          |          |                                                                                                                                                                                                                                      |
| <b>Enrichment by Pathway Maps</b>                                                                                 |       |         |          |          |                                                                                                                                                                                                                                      |
| CFTR folding and maturation (normal and CF)                                                                       | 21    | 4       | 5.78E-05 | 1.20E-02 | HSP70, HSP40, UGCGL1, HSP105                                                                                                                                                                                                         |
| Transport_Clathrin-coated vesicle cycle                                                                           | 71    | 6       | 9.03E-05 | 1.20E-02 | Rab11-FIP1, Syntaxin 5, GOS-28, SAR1, Syntaxin 12, Rab11-FIP2                                                                                                                                                                        |
| Transcription_Transcription regulation of aminoacid metabolism                                                    | 25    | 4       | 1.18E-04 | 1.20E-02 | NFE2L1, NRF2, c-Myc, KEAP1                                                                                                                                                                                                           |
| Apoptosis and survival_Role of IAP-proteins in apoptosis                                                          | 31    | 4       | 2.81E-04 | 2.13E-02 | HSP70, TNF-R1, c-IAP2, Bax                                                                                                                                                                                                           |
| Apoptosis and survival_TNFR1 signaling pathway                                                                    | 43    | 4       | 1.00E-03 | 6.08E-02 | Caspase-2, TNF-R1, c-IAP2, Bax                                                                                                                                                                                                       |
| Development_G-CSF signaling                                                                                       | 49    | 4       | 1.64E-03 | 7.25E-02 | CXCR4, c-IAP2, c-Myc, IL8RB                                                                                                                                                                                                          |
| Development_ERKS in cell proliferation and neuronal survival                                                      | 23    | 3       | 1.67E-03 | 7.25E-02 | Sequestosome 1(p62), Rap 1, c-Fos                                                                                                                                                                                                    |
| Apoptosis and survival_Role of PKR in stress-induced apoptosis                                                    | 53    | 4       | 2.19E-03 | 8.33E-02 | TRAM, TNF-R1, TARBP2, c-Myc                                                                                                                                                                                                          |
| Development_EGFR signaling via small GTPases                                                                      | 33    | 3       | 4.77E-03 | 1.44E-01 | VAV-2, c-Myc, c-Fos                                                                                                                                                                                                                  |
| Apoptosis and survival_Caspase cascade                                                                            | 33    | 3       | 4.77E-03 | 1.44E-01 | Caspase-2, TNF-R1, Bax                                                                                                                                                                                                               |
| <b>Enrichment by Process Networks</b>                                                                             |       |         |          |          |                                                                                                                                                                                                                                      |
| Development_Blood vessel morphogenesis                                                                            | 228   | 11      | 5.76E-04 | 6.68E-02 | Galpha(s)-specific nucleotide-like GPCRs, CRK, Galpha(i)-specific amine GPCRs, Galpha(q)-specific peptide GPCRs, PDE, CXCR4, PDE9A, Galpha(i)-specific peptide GPCRs, Galpha(q)-specific nucleotide-like GPCRs, c-Myc, c-Fos         |
| Chemotaxis                                                                                                        | 137   | 8       | 9.89E-04 | 6.68E-02 | CX3CR1, FPRL2, Galpha(q)-specific peptide GPCRs, FPR, NCAM1, Galpha(i)-specific peptide GPCRs, CCR7, IL8RB                                                                                                                           |
| Protein folding_Response to unfolded proteins                                                                     | 69    | 5       | 3.61E-03 | 1.63E-01 | HSP70, HSP40, HSPA1A, HSP105, HSPA1B                                                                                                                                                                                                 |
| Development_ERKS in cell proliferation and neuronal survival                                                      | 24    | 3       | 5.27E-03 | 1.78E-01 | Sequestosome 1(p62), c-Myc, c-Fos                                                                                                                                                                                                    |
| Protein folding_Folding in normal condition                                                                       | 119   | 6       | 8.70E-03 | 2.35E-01 | NFYC, HSP70, HSP40, HSPA1A, HSP105, HSPA1B                                                                                                                                                                                           |
| Reproduction_Feeding and Neurohormone signaling                                                                   | 211   | 8       | 1.36E-02 | 3.06E-01 | HSP70, Galpha(q)-specific peptide GPCRs, Galpha(q)-specific Class A Orphan/other GPCRs, Galpha(i)-specific peptide GPCRs, c-Myc, c-Fos, LAMG1, Bax                                                                                   |
| Apoptosis_Anti-Apoptosis mediated by external signals via MAPK and JAK/STAT                                       | 179   | 7       | 1.76E-02 | 3.40E-01 | CRK, VAV-2, c-IAP2, c-Myc, MEK4(MAP3K4), c-Fos, Bax                                                                                                                                                                                  |
| Inflammation_Inflammasome                                                                                         | 118   | 5       | 3.17E-02 | 4.99E-01 | TRAM, TNF-R1, TLR8, NALP12, Nod2 (CARD15)                                                                                                                                                                                            |
| Cell adhesion_Leucocyte chemotaxis                                                                                | 205   | 7       | 3.38E-02 | 4.99E-01 | CX3CR1, Galpha(q)-specific peptide GPCRs, CXCR4, Galpha(i)-specific peptide GPCRs, CCR7, CaMK II delta, IL8RB                                                                                                                        |
| Apoptosis_Death Domain receptors & caspases in apoptosis                                                          | 123   | 5       | 3.70E-02 | 4.99E-01 | Caspase-2, TNF-R1, c-IAP2, NALP12, Nod2 (CARD15)                                                                                                                                                                                     |
| <b>Enrichment by GO Processes</b>                                                                                 |       |         |          |          |                                                                                                                                                                                                                                      |
| regulation of vasodilation                                                                                        | 64    | 10      | 6.77E-13 | 1.38E-09 | Galpha(i)-specific amine GPCRs, Galpha(i)-specific nucleotide-like GPCRs, P2Y2, Guanylate cyclase, Galpha(q)-specific peptide GPCRs, Beta-2 adrenergic receptor, Beta-adrenergic receptor, Galpha(i)-specific peptide GPCRs, Galpha  |
| G-protein coupled purinergic nucleotide receptor signaling pathway                                                | 18    | 7       | 2.75E-09 | 2.79E-06 | Galpha(s)-specific nucleotide-like GPCRs, Galpha(i)-specific nucleotide-like GPCRs, P2Y2, P2Y10, Galpha(q)-specific Class A Orphan/other GPCRs, Galpha(q)-specific nucleotide-like GPCRs, GPR86                                      |
| positive regulation of vasodilation                                                                               | 43    | 9       | 6.83E-09 | 4.62E-06 | Galpha(s)-specific nucleotide-like GPCRs, Urocortin, Galpha(i)-specific amine GPCRs, Galpha(q)-specific peptide GPCRs, Beta-2 adrenergic receptor, Beta-adrenergic receptor, Galpha(i)-specific peptide GPCRs, Galpha(q)-specific nu |
| regulation of systemic arterial blood pressure by norepinephrine-epinephrine                                      | 17    | 4       | 3.78E-08 | 1.38E-05 | Galpha(i)-specific amine GPCRs, Beta-2 adrenergic receptor, Beta-adrenergic receptor, Galpha(s)-specific amine GPCRs                                                                                                                 |
| positive regulation of the force of heart contraction by epinephrine                                              | 4     | 4       | 3.78E-08 | 1.38E-05 | Galpha(i)-specific amine GPCRs, Beta-2 adrenergic receptor, Beta-adrenergic receptor, Galpha(s)-specific amine GPCRs                                                                                                                 |
| Inflammatory response                                                                                             | 593   | 24      | 4.43E-08 | 1.38E-05 | Galpha(s)-specific nucleotide-like GPCRs, K(+) channel, subfamily J, Urocortin, Galpha(i)-specific amine GPCRs, TRAM, Galpha(i)-specific nucleotide-like GPCRs, C/EBP, FPRL2, Galpha(q)-specific peptide GPCRs, TNF-R1, TLR8, Galpha |
| regulation of calcium ion transport                                                                               | 221   | 9       | 4.75E-08 | 1.38E-05 | Galpha(s)-specific nucleotide-like GPCRs, Galpha(i)-specific amine GPCRs, Galpha(q)-specific peptide GPCRs, Beta-2 adrenergic receptor, CXCR4, Beta-adrenergic receptor, Galpha(i)-specific peptide GPCRs, Galpha(q)-specific nu     |
| negative regulation of ossification                                                                               | 48    | 7       | 1.94E-07 | 4.00E-05 | Galpha(i)-specific amine GPCRs, Galpha(i)-specific nucleotide-like GPCR, P2Y2, Beta-2 adrenergic receptor, Beta-adrenergic receptor, Galpha(q)-specific peptide GPCRs, Galpha(s)-specific amine GPCRs                                |
| microglial cell activation involved in immune response                                                            | 11    | 5       | 2.25E-07 | 4.00E-05 | CX3CR1, TLR8, Galpha(i)-specific peptide GPCRs, TLR6, Nod2 (CARD15)                                                                                                                                                                  |
| negative regulation of urine volume                                                                               | 11    | 5       | 2.25E-07 | 4.00E-05 | Galpha(i)-specific amine GPCRs, Galpha(q)-specific peptide GPCRs, Beta-2 adrenergic receptor, Beta-adrenergic receptor, Galpha(s)-specific amine GPCRs                                                                               |

Table S1 (Continued)

(Clusters 7 and 8)

|                                                                                                      | Total | In Data | p-value  | FDR      | Network Objects from Active Data                                                                                                                              |
|------------------------------------------------------------------------------------------------------|-------|---------|----------|----------|---------------------------------------------------------------------------------------------------------------------------------------------------------------|
|                                                                                                      |       |         |          |          |                                                                                                                                                               |
| <b>Cluster 7: Cytotoxic Lymphocyte Proliferation (n=149)</b>                                         |       |         |          |          |                                                                                                                                                               |
| <b>Enrichment by Pathway Maps</b>                                                                    |       |         |          |          |                                                                                                                                                               |
| Immune response_Role of DAP12 receptors in NK cells                                                  | 54    | 6       | 1.37E-06 | 2.65E-04 | PI3K cat class IA, Lck, KIR2DL3, KIR2DL4, ZAP70, CD94                                                                                                         |
| Cell cycle_Start of DNA replication in early S phase                                                 | 32    | 5       | 1.95E-06 | 2.65E-04 | MCM4, MCM3, HP1 alpha, Histone H1, Cyclin E                                                                                                                   |
| Cytoskeleton remodeling_Role of PDGFs in cell migration                                              | 24    | 4       | 1.72E-05 | 1.56E-03 | PI3K cat class IA, PDGF receptor, Tiam1, PDGF-R-beta                                                                                                          |
| Cell cycle_Transition and termination of DNA replication                                             | 28    | 4       | 3.25E-05 | 2.21E-03 | TOP2 alpha, TOP2, Cyclin A, Brca1                                                                                                                             |
| G-protein signaling_H-RAS regulation pathway                                                         | 37    | 4       | 1.00E-04 | 5.06E-03 | PI3K cat class IA, Tiam1, PDGF-R-beta, Lck                                                                                                                    |
| Cell cycle_Regulation of G1/S transition (part 1)                                                    | 38    | 4       | 1.12E-04 | 5.06E-03 | PP2A regulatory, Cyclin A, Brca1, Cyclin E                                                                                                                    |
| Cell cycle_Chromosome condensation in prometaphase                                                   | 21    | 3       | 3.45E-04 | 1.20E-02 | TOP2, Cyclin A, Histone H1                                                                                                                                    |
| Some pathways of EMT in cancer cells                                                                 | 51    | 4       | 3.54E-04 | 1.20E-02 | PI3K cat class IA, PDGF receptor, Axin, PDGF-R-beta                                                                                                           |
| Neurophysiological process_Dopamine D2 receptor transactivation of PDGFR in CNS                      | 26    | 3       | 6.59E-04 | 1.99E-02 | PDGF receptor, PP2A regulatory, PDGF-R-beta                                                                                                                   |
| Apoptosis and survival_Granzyme A signaling                                                          | 30    | 3       | 1.01E-03 | 2.08E-02 | Histone H1, Perforin, Granzyme A                                                                                                                              |
| <b>Enrichment by Process Networks</b>                                                                |       |         |          |          |                                                                                                                                                               |
| Cell cycle_S phase                                                                                   | 149   | 13      | 2.48E-09 | 2.95E-07 | MCM4, Histone H4, MCM3, TOP2 alpha, TOP2, HP1, Cyclin A2, HP1 alpha, Cyclin A, Brca1, Histone H1, Cyclin E, CDC14a                                            |
| Inflammation_NK cell cytotoxicity                                                                    | 164   | 10      | 5.55E-06 | 2.60E-04 | PPP2R2B, IL-2R beta chain, Lck, KIR2DL3, Histone H1, KIR2DL4, ZAP70, CD94, Perforin, Granzyme A                                                               |
| Cell cycle_G2-M                                                                                      | 206   | 11      | 6.55E-06 | 2.60E-04 | PDGF receptor, TOP2 alpha, UBE2C, TOP2, Cyclin A2, Cyclin A, CDC20, PDGF-R-beta, Brca1, Histone H1, CDC14a                                                    |
| Cell cycle_Core                                                                                      | 115   | 8       | 1.99E-05 | 5.93E-04 | MCM4, MCM3, TOP2, HP1 alpha, Cyclin A, CDC20, Cyclin E, CDC14a                                                                                                |
| Cell cycle_G1-S                                                                                      | 163   | 9       | 3.75E-05 | 8.93E-04 | Axin, TYSY, UHRF1, Cyclin A2, Cyclin A, Brca1, Cyclin E, CDC14a, Axin1                                                                                        |
| Cell cycle_Mitosis                                                                                   | 179   | 9       | 7.80E-05 | 1.55E-03 | TTK, Tubulin beta, TOP2, HP1, HP1 alpha, Cyclin A, CDC20, Histone H1, HDAC6                                                                                   |
| Cytoskeleton_Spinidie microtubules                                                                   | 109   | 7       | 1.13E-04 | 1.93E-03 | MKLP2, TTK, Tubulin beta, UBE2C, CDC20, CDC14a, Sororin                                                                                                       |
| Immune response_TCR signaling                                                                        | 174   | 8       | 3.69E-04 | 5.49E-03 | CD8 alpha, PI3K cat class IA, MADD, CD8, Lck, SKAP55, ZAP70, CD3 gamma                                                                                        |
| Cell cycle_Meiosis                                                                                   | 106   | 6       | 7.06E-04 | 9.34E-03 | PI3K cat class IA, Tubulin beta, PP2A regulatory, Cyclin A, CDC20, Brca1                                                                                      |
| Cell cycle_G1-S Growth factor regulation                                                             | 195   | 8       | 7.88E-04 | 9.37E-03 | PI3K cat class IA, PPP2R2B, Cyclin A2, PP2A regulatory, FGF9, Cyclin A, Cyclin E, PI3K cat class IA (p110-beta)                                               |
| <b>Enrichment by GO Processes</b>                                                                    |       |         |          |          |                                                                                                                                                               |
| phosphatidylinositol-mediated signaling                                                              | 178   | 11      | 1.33E-08 | 1.79E-05 | Histone H4, PI3K cat class IA, PDGF receptor, TOP2 alpha, TYSY, UBE2C, TOP2, FGF9, PDGF-R-beta, Lck, PI3K cat class IA (p110-beta)                            |
| cell surface receptor signaling pathway                                                              | 3985  | 14      | 3.40E-08 | 2.28E-05 | CD8 alpha, PI3K cat class IA, MADD, IL7RA, CD8, CBL-B, LAG3, Lck, KLR1, Galpha(q)-specific peptide GPCRs, CD3 gamma, CD94, DR3(TNFRSF12), Fc epsilon RI alpha |
| positive regulation of phosphoprotein phosphatase activity                                           | 14    | 4       | 1.32E-06 | 5.92E-04 | PDGF receptor, PP2A regulatory, PDGF-R-beta, Galpha(q)-specific peptide GPCRs                                                                                 |
| mitotic cell cycle                                                                                   | 852   | 14      | 3.21E-06 | 8.90E-04 | MCM4, MCM3, TOP2 alpha, Tubulin beta, TYSY, CEP164, UBE2C, TOP2, Cyclin A2, PP2A regulatory, Cyclin A, CDC20, Cyclin E, Sororin                               |
| embryonic cleavage                                                                                   | 16    | 4       | 3.32E-06 | 8.90E-04 | PI3K cat class IA, TOP2 alpha, TOP2, PI3K cat class IA (p110-beta)                                                                                            |
| cell activation                                                                                      | 269   | 6       | 5.34E-06 | 1.19E-03 | CD8 alpha, PI3K cat class IA, CD8, CBL-B, ZAP70, CD3 gamma                                                                                                    |
| transmembrane receptor protein tyrosine kinase signaling pathway                                     | 705   | 7       | 9.98E-06 | 1.70E-03 | CD8 alpha, PI3K cat class IA, PDGF receptor, CD8, PDGF-R-beta, Galpha(q)-specific peptide GPCRs, PI3K cat class IA (p110-beta)                                |
| mast cell chemotaxis                                                                                 | 7     | 3       | 1.01E-05 | 1.70E-03 | PI3K cat class IA, CCR3, Galpha(q)-specific peptide GPCRs                                                                                                     |
| Wnt receptor signaling pathway involved in somitogenesis                                             | 9     | 3       | 2.41E-05 | 2.31E-03 | Axin, PP2A regulatory, Axin1                                                                                                                                  |
| platelet aggregation                                                                                 | 26    | 4       | 2.59E-05 | 2.31E-03 | PI3K cat class IA, PDGF receptor, Tspan32, PI3K cat class IA (p110-beta)                                                                                      |
| <b>Cluster 8: Undefined (n=45)</b>                                                                   |       |         |          |          |                                                                                                                                                               |
| <b>Enrichment by Pathway Maps</b>                                                                    |       |         |          |          |                                                                                                                                                               |
| Glycolysis and gluconeogenesis p.3 / Human version                                                   | 24    | 2       | 1.13E-03 | 4.23E-02 | ENO, ENO2                                                                                                                                                     |
| Glycolysis and gluconeogenesis p.3                                                                   | 24    | 2       | 1.13E-03 | 4.23E-02 | ENO, ENO2                                                                                                                                                     |
| Muscle contraction_Relaxin signaling pathway                                                         | 48    | 2       | 4.48E-03 | 9.82E-02 | MMP-9, p90Rsk                                                                                                                                                 |
| Cell adhesion_ECM remodeling                                                                         | 52    | 2       | 5.24E-03 | 9.82E-02 | MMP-9, SERPINE2                                                                                                                                               |
| Development_c-Kit ligand signaling pathway during hemopoiesis                                        | 61    | 2       | 7.15E-03 | 1.04E-01 | MMP-9, p90Rsk                                                                                                                                                 |
| Glycolysis and gluconeogenesis (short map)                                                           | 66    | 2       | 8.32E-03 | 1.04E-01 | ENO, ENO2                                                                                                                                                     |
| Cytoskeleton remodeling_RalB regulation pathway                                                      | 13    | 1       | 2.71E-02 | 1.42E-01 | REF52                                                                                                                                                         |
| Protein folding_Membrane trafficking and signal transduction of G-alpha (i) heterotrimeric G-protein | 19    | 1       | 3.94E-02 | 1.42E-01 | G-protein gamma                                                                                                                                               |
| Cell cycle_Chromosome condensation in prometaphase                                                   | 21    | 1       | 4.34E-02 | 1.42E-01 | Histone H1                                                                                                                                                    |
| Role of ZNF202 in regulation of expression of genes involved in atherosclerosis                      | 21    | 1       | 4.34E-02 | 1.42E-01 | LCAT                                                                                                                                                          |
| <b>Enrichment by Process Networks</b>                                                                |       |         |          |          |                                                                                                                                                               |
| Muscle contraction_Relaxin signaling                                                                 | 83    | 2       | 1.44E-02 | 4.12E-01 | MMP-9, p90Rsk                                                                                                                                                 |
| Proteolysis_Connective tissue degradation                                                            | 119   | 2       | 2.84E-02 | 4.12E-01 | MMP-9, SERPINE2                                                                                                                                               |
| Reproduction_FSH-beta signaling pathway                                                              | 160   | 2       | 4.88E-02 | 4.12E-01 | p90Rsk3(RPS6KA2), p90Rsk                                                                                                                                      |
| Cell adhesion_Platelet-endothelium-leucocyte interactions                                            | 174   | 2       | 5.67E-02 | 4.12E-01 | MMP-9, SERPINE2                                                                                                                                               |
| Development_Neurogenesis in general                                                                  | 192   | 2       | 6.74E-02 | 4.12E-01 | p90Rsk3(RPS6KA2), SERPINE2                                                                                                                                    |
| Cell cycle_G2-M                                                                                      | 206   | 2       | 7.63E-02 | 4.12E-01 | Histone H1, p90Rsk                                                                                                                                            |
| Development_EMT_Regulation of epithelial-to-mesenchymal transition                                   | 226   | 2       | 8.95E-02 | 4.12E-01 | MMP-9, p90Rsk                                                                                                                                                 |
| Development_Blood vessel morphogenesis                                                               | 228   | 2       | 9.09E-02 | 4.12E-01 | PDE, Prokineticin 2                                                                                                                                           |
| Neurophysiological process_Melatonin signaling                                                       | 43    | 1       | 9.22E-02 | 4.12E-01 | STS                                                                                                                                                           |
| Reproduction_Male sex differentiation                                                                | 246   | 2       | 1.03E-01 | 4.12E-01 | Histone H1, Prokineticin 2                                                                                                                                    |
| <b>Enrichment by GO Processes</b>                                                                    |       |         |          |          |                                                                                                                                                               |
| positive regulation of G-protein coupled receptor protein signaling pathway                          | 28    | 3       | 9.77E-06 | 2.23E-03 | PDE6 reg, PDE, PDE6H                                                                                                                                          |
| cardiac muscle cell apoptotic process                                                                | 16    | 3       | 9.77E-06 | 2.23E-03 | G-protein gamma, p90Rsk3(RPS6KA2), p90Rsk                                                                                                                     |
| regulation of autophagy                                                                              | 85    | 3       | 1.68E-05 | 2.56E-03 | ULK1, Uncharacterized protein C20orf117, SOGA1                                                                                                                |
| positive regulation of epidermal growth factor receptor signaling pathway                            | 36    | 3       | 2.30E-05 | 2.62E-03 | PDE6 reg, PDE, PDE6H                                                                                                                                          |
| oocyte maturation                                                                                    | 24    | 3       | 3.48E-05 | 3.17E-03 | p90Rsk3(RPS6KA2), PDE, p90Rsk                                                                                                                                 |
| activation of MAPK activity                                                                          | 190   | 5       | 4.31E-05 | 3.28E-03 | G-protein gamma, PDE6 reg, PDE, PDE6H, Prokineticin 2                                                                                                         |
| regulation of protein processing                                                                     | 62    | 2       | 6.93E-05 | 4.52E-03 | p90Rsk3(RPS6KA2), p90Rsk                                                                                                                                      |
| mitotic metaphase                                                                                    | 6     | 2       | 1.04E-04 | 5.92E-03 | p90Rsk3(RPS6KA2), p90Rsk                                                                                                                                      |
| nucleosome positioning                                                                               | 7     | 2       | 1.45E-04 | 7.35E-03 | Histone H1.2, Histone H1                                                                                                                                      |
| cellular response to carbohydrate stimulus                                                           | 103   | 2       | 1.93E-04 | 8.81E-03 | p90Rsk3(RPS6KA2), p90Rsk                                                                                                                                      |
